# Supplementary material for: Viral DNAemia and DNA Virus Seropositivity and Mortality in Pediatric Sepsis
Source: PubMed Central journal article supplement (PMC10897747; doi:10.1001/jamanetworkopen.2024.0383), 2024-02-26
Supplement: jamanetwopen-e240383-s001.pdf [file jamanetwopen-e240383-s001.pdf]

## Supplementary Online Content

Cabler SS, Storch GA, Weinberg JB, et al. Viral DNAemia and DNA virus seropositivity and mortality in pediatric sepsis. *JAMA Netw Open*. 2024;7(2):e240383. doi:10.1001/jamanetworkopen.2024.0383

**eTable 1.** Patient Characteristics at ICU Admission by Virus Detection

**eTable 2.** Patient Characteristics at ICU Admission by Results of Viral Serologic Testing

**eTable 3.** Comparisons of Herpesvirus PCR and Serology Status

**eTable 4.** Univariable Analysis of Admission Demographic and Clinical Factors Associated With Mortality

**eTable 5.** Comparisons of EBV PCR and Serology Status and Mortality

**eTable 6.** Comparisons of CMV PCR and Serology Status and Mortality

**eTable 7.** Comparisons of HSV-1 PCR and Serology Status and Mortality

**eTable 8.** Comparisons of HHV-6 PCR and Serology Status and Mortality

**eTable 9.** Comparison of Ferritin, CRP, and PRISM Across EBV Virus Positivity Cohorts in Vital Status Categories

**eTable 10.** Comparison of Ferritin, CRP, and PRISM Across CMV Virus Positivity Cohorts in Vital Status Categories

**eTable 11.** Comparison of Ferritin, CRP, and PRISM Across HSV-1 Virus Positivity Cohorts in Vital Status Categories

**eTable 12.** Comparison of Ferritin, CRP, and PRISM Across HHV-6 Virus Positivity Cohorts in Vital Status Categories

This supplementary material has been provided by the authors to give readers additional information about their work.

**eTable 1. Patient Characteristics at ICU Admission by Virus Detection**

|                                             | EBV+<br>(N = 53)        | CMV+<br>(N = 52) | HSV-1+<br>(N = 11)       | Adeno+<br>(N = 40) | BKPyV+<br>(N = 32) | Parvo+<br>(N = 28)      | HHV-6+<br>(N = 93) | TTV+<br>(N = 368)      |
|---------------------------------------------|-------------------------|------------------|--------------------------|--------------------|--------------------|-------------------------|--------------------|------------------------|
| <b>DEMOGRAPHICS</b>                         |                         |                  |                          |                    |                    |                         |                    |                        |
| Age (years)                                 | 10 [3, 13] <sup>γ</sup> | 6 [1, 11]        | 12 [10, 15] <sup>γ</sup> | 6 [2, 12]          | 8 [4, 12]          | 12 [5, 15] <sup>γ</sup> | 6 [1, 12]          | 6 [1, 12]              |
| Sex: Male                                   | 29 (55%)                | 28 (54%)         | 6 (55%)                  | 24 (60%)           | 16 (50%)           | 18 (64%)                | 56 (60%)           | 198 (54%)              |
| Race                                        |                         |                  |                          |                    |                    |                         |                    |                        |
| White                                       | 30 (57%) <sup>γ</sup>   | 36 (69%)         | 8 (73%)                  | 28 (70%)           | 21 (66%)           | 20 (71%)                | 65 (70%)           | 245 (67%)              |
| Black or African American                   | 17 (32%) <sup>γ</sup>   | 11 (21%)         | 3 (27%)                  | 5 (13%)            | 7 (22%)            | 7 (25%)                 | 17 (18%)           | 77 (21%)               |
| Multiracial                                 | 2 (4%) <sup>γ</sup>     | 0 (0%)           | 0 (0%)                   | 1 (3%)             | 1 (3%)             | 1 (4%)                  | 1 (1%)             | 3 (1%)                 |
| Other                                       | 2 (4%) <sup>γ</sup>     | 2 (4%)           | 0 (0%)                   | 4 (10%)            | 1 (3%)             | 0 (0%)                  | 3 (3%)             | 19 (5%)                |
| Unknown or not reported                     | 2 (4%) <sup>γ</sup>     | 3 (6%)           | 0 (0%)                   | 2 (5%)             | 2 (6%)             | 0 (0%)                  | 7 (8%)             | 24 (7%)                |
| Ethnicity                                   |                         |                  |                          |                    |                    |                         |                    |                        |
| Unknown or Not Reported                     | 2 (4%)                  | 1 (2%)           | 0 (0%)                   | 1 (3%)             | 3 (9%)             | 2 (7%)                  | 3 (3%)             | 13 (4%)                |
| Hispanic or Latino                          | 13 (25%)                | 11 (21%)         | 0 (0%)                   | 4 (10%)            | 5 (16%)            | 2 (7%)                  | 13 (14%)           | 65 (18%) <sup>β</sup>  |
| Not Hispanic or Latino                      | 38 (72%)                | 40 (77%)         | 11 (100%)                | 35 (88%)           | 24 (75%)           | 24 (86%)                | 77 (83%)           | 290 (79%) <sup>β</sup> |
| <b>ILLNESS SEVERITY</b>                     |                         |                  |                          |                    |                    |                         |                    |                        |
| PRISM <sup>a</sup>                          | 10 [3, 16]              | 9 [3, 16]        | 11 [5, 27]               | 7 [3, 15]          | 10 [0, 18]         | 11 [6, 21] <sup>β</sup> | 8 [5, 16]          | 8 [3, 15]              |
| <b>INFECTION AT ELIGIBILITY<sup>b</sup></b> |                         |                  |                          |                    |                    |                         |                    |                        |
| Documented Infection                        | 30 (57%)                | 34 (65%)         | 6 (55%)                  | 26 (65%)           | 21 (66%)           | 13 (46%)                | 53 (57%)           | 210 (57%)              |
| Bacterial                                   | 25 (47%)                | 17 (33%)         | 4 (36%)                  | 11 (28%)           | 7 (22%)            | 8 (29%)                 | 27 (29%)           | 133 (36%)              |
| Fungal                                      | 1 (2%)                  | 3 (6%)           | 0 (0%)                   | 2 (5%)             | 1 (3%)             | 1 (4%)                  | 3 (3%)             | 4 (1%)                 |
| Protozoal                                   | 0 (0%)                  | 1 (2%)           | 0 (0%)                   | 0 (0%)             | 0 (0%)             | 0 (0%)                  | 0 (0%)             | 1 (0%)                 |
| Viral <sup>c</sup>                          | 11 (21%)                | 20 (38%)         | 2 (18%)                  | 16 (40%)           | 15 (47%)           | 5 (18%)                 | 30 (32%)           | 102 (28%)              |
| <b>DIAGNOSES</b>                            |                         |                  |                          |                    |                    |                         |                    |                        |
| ICU Admit Diagnosis                         |                         |                  |                          |                    |                    |                         |                    |                        |
| Cardiac arrest                              | 1 (2%)                  | 3 (6%)           | 0 (0%)                   | 0 (0%)             | 0 (0%)             | 0 (0%)                  | 3 (3%)             | 12 (3%)                |
| Cardiac disease                             | 0 (0%)                  | 1 (2%)           | 0 (0%)                   | 2 (5%)             | 2 (6%)             | 1 (4%)                  | 4 (4%)             | 17 (5%)                |
| Liver failure                               | 0 (0%)                  | 0 (0%)           | 0 (0%)                   | 0 (0%)             | 0 (0%)             | 0 (0%)                  | 0 (0%)             | 5 (1%)                 |

**eTable 1. Patient Characteristics at ICU Admission by Virus Detection**

|                                          | EBV+<br>(N = 53) | CMV+<br>(N = 52) | HSV-1+<br>(N = 11) | Adeno+<br>(N = 40)    | BKPyV+<br>(N = 32)    | Parvo+<br>(N = 28) | HHV-6+<br>(N = 93)    | TTV+<br>(N = 368) |
|------------------------------------------|------------------|------------------|--------------------|-----------------------|-----------------------|--------------------|-----------------------|-------------------|
| Renal failure                            | 1 (2%)           | 2 (4%)           | 2 (18%)            | 2 (5%)                | 1 (3%)                | 1 (4%)             | 4 (4%)                | 8 (2%)            |
| Respiratory failure                      | 19 (36%)         | 20 (38%)         | 2 (18%)            | 18 (45%)              | 10 (31%)              | 9 (32%)            | 37 (40%)              | 150 (41%)         |
| Seizure                                  | 2 (4%)           | 2 (4%)           | 0 (0%)             | 2 (5%)                | 2 (6%)                | 2 (7%)             | 3 (3%)                | 11 (3%)           |
| Sepsis                                   | 24 (45%)         | 19 (37%)         | 4 (36%)            | 11 (28%)              | 13 (41%)              | 8 (29%)            | 29 (31%)              | 114 (31%)         |
| Other neurologic disease                 | 2 (4%)           | 0 (0%)           | 1 (9%)             | 1 (3%)                | 0 (0%)                | 1 (4%)             | 4 (4%)                | 14 (4%)           |
| Other                                    | 4 (8%)           | 5 (10%)          | 2 (18%)            | 4 (10%)               | 4 (13%)               | 6 (21%)            | 9 (10%)               | 37 (10%)          |
| <b>PAST MEDICAL HISTORY</b>              |                  |                  |                    |                       |                       |                    |                       |                   |
| Previously healthy                       | 19 (36%)         | 16 (31%)         | 6 (55%)            | 12 (30%)              | 10 (31%)              | 13 (46%)           | 36 (39%)              | 143 (39%)         |
| Immunocompromised                        | 16 (30%)         | 20 (38%)         | 3 (27%)            | 18 (45%) <sup>γ</sup> | 15 (47%) <sup>β</sup> | 9 (32%)            | 35 (38%) <sup>β</sup> | 103 (28%)         |
| Malignancy- Hematologic                  | 4 (8%)           | 8 (15%)          | 0 (0%)             | 4 (10%)               | 8 (25%) <sup>γ</sup>  | 2 (7%)             | 12 (13%)              | 33 (9%)           |
| Malignancy- Solid tumor                  | 4 (8%)           | 2 (4%)           | 0 (0%)             | 1 (3%)                | 1 (3%)                | 3 (11%)            | 6 (6%)                | 15 (4%)           |
| Hematopoietic cell transplant            | 4 (8%)           | 6 (12%)          | 0 (0%)             | 8 (20%) <sup>γ</sup>  | 10 (31%) <sup>γ</sup> | 4 (14%)            | 12 (13%) <sup>γ</sup> | 23 (6%)           |
| Solid organ transplant                   | 1 (2%)           | 2 (4%)           | 1 (9%)             | 3 (8%)                | 0 (0%)                | 0 (0%)             | 3 (3%)                | 10 (3%)           |
| Genetic Disorder/Chromosomal abnormality | 11 (21%)         | 10 (19%)         | 1 (9%)             | 6 (15%)               | 4 (13%)               | 3 (11%)            | 16 (17%)              | 56 (15%)          |
| Metabolic/Mitochondrial disease          | 2 (4%)           | 2 (4%)           | 0 (0%)             | 4 (10%)               | 0 (0%)                | 0 (0%)             | 3 (3%)                | 18 (5%)           |

The table includes counts and summaries for positive viral infections. Viral testing could not be completed on all patients. Patients with failed or missing viral testing were: EBV n=16 patients, CMV n=10, HSV-1 n=16, Adenovirus n=20, BKPyV n=16, Parvo-B19 n=20, HHV-6 n=10, TTV n=10. Comparisons among viral positive vs. negative patients were performed using the Wilcoxon rank sum test or Fisher's exact test as appropriate. Footnotes <sup>γ</sup> indicate p-values <0.01, <sup>β</sup> indicate <0.025, and <sup>α</sup> indicate <0.05.

<sup>a</sup> The worst physiologic values 2 hours prior to ICU admission through 4 hours post ICU admission were used to calculate PRISM.

<sup>b</sup> Patients could have had multiple types of documented infection at eligibility; counts are not mutually exclusive.

<sup>c</sup> Viral infection(s) at eligibility was determined by respective research coordinator chart review and does not include results of investigative viral testing subsequently performed for this study.

**eTable 2.** Patient Characteristics at ICU Admission by Results of Viral Serologic Testing

|                                             | EBV Serology         |                       |                    | CMV Serology          |                       |                    | HSV Serology          |                      |                    | HHV-6 Serology      |                       |                    |
|---------------------------------------------|----------------------|-----------------------|--------------------|-----------------------|-----------------------|--------------------|-----------------------|----------------------|--------------------|---------------------|-----------------------|--------------------|
|                                             | Negative<br>(N = 99) | Positive<br>(N = 152) | P-value            | Negative<br>(N = 145) | Positive<br>(N = 107) | P-value            | Negative<br>(N = 162) | Positive<br>(N = 82) | P-value            | Negative<br>(N = 4) | Positive<br>(N = 253) | P-value            |
| <b>DEMOGRAPHICS</b>                         |                      |                       |                    |                       |                       |                    |                       |                      |                    |                     |                       |                    |
| Age (years)                                 | 6 [3, 12]            | 10 [6, 14]            | 0.003 <sup>d</sup> | 8 [4, 13]             | 9 [5, 13]             | 0.270 <sup>d</sup> | 7 [4, 13]             | 12 [6, 14]           | 0.002 <sup>d</sup> | 6 [4, 9]            | 9 [5, 13]             | 0.308 <sup>d</sup> |
| Sex: Male                                   | 63 (64%)             | 77 (51%)              | 0.051 <sup>e</sup> | 83 (57%)              | 57 (53%)              | 0.608 <sup>e</sup> | 93 (57%)              | 44 (54%)             | 0.588 <sup>e</sup> | 3 (75%)             | 140 (55%)             | 0.632 <sup>e</sup> |
| Race                                        |                      |                       | 0.152 <sup>e</sup> |                       |                       | 0.727 <sup>e</sup> |                       |                      | 0.985 <sup>e</sup> |                     |                       | 0.196 <sup>e</sup> |
| White                                       | 75 (76%)             | 100 (66%)             |                    | 106 (73%)             | 70 (65%)              |                    | 115 (71%)             | 55 (67%)             |                    | 1 (25%)             | 177 (70%)             |                    |
| Black or African American                   | 14 (14%)             | 34 (22%)              |                    | 28 (19%)              | 21 (20%)              |                    | 31 (19%)              | 16 (20%)             |                    | 2 (50%)             | 48 (19%)              |                    |
| Multiracial                                 | 0 (0%)               | 2 (1%)                |                    | 1 (1%)                | 1 (1%)                |                    | 2 (1%)                | 0 (0%)               |                    | 0 (0%)              | 2 (1%)                |                    |
| Other                                       | 8 (8%)               | 7 (5%)                |                    | 7 (5%)                | 8 (7%)                |                    | 10 (6%)               | 4 (5%)               |                    | 0 (0%)              | 15 (6%)               |                    |
| Unknown or not reported                     | 2 (2%)               | 9 (6%)                |                    | 3 (2%)                | 7 (7%)                |                    | 4 (2%)                | 7 (9%)               |                    | 1 (25%)             | 11 (4%)               |                    |
| Ethnicity                                   |                      |                       | 0.327 <sup>e</sup> |                       |                       | 0.332 <sup>e</sup> |                       |                      | 0.613 <sup>e</sup> |                     |                       | 1.000 <sup>e</sup> |
| Unknown or Not Reported                     | 3 (3%)               | 5 (3%)                |                    | 7 (5%)                | 1 (1%)                |                    | 7 (4%)                | 1 (1%)               |                    | 0 (0%)              | 8 (3%)                |                    |
| Hispanic or Latino                          | 16 (16%)             | 33 (22%)              |                    | 24 (17%)              | 24 (22%)              |                    | 30 (19%)              | 18 (22%)             |                    | 0 (0%)              | 49 (19%)              |                    |
| Not Hispanic or Latino                      | 80 (81%)             | 114 (75%)             |                    | 114 (79%)             | 82 (77%)              |                    | 125 (77%)             | 63 (77%)             |                    | 4 (100%)            | 196 (77%)             |                    |
| <b>ILLNESS SEVERITY</b>                     |                      |                       |                    |                       |                       |                    |                       |                      |                    |                     |                       |                    |
| PRISM <sup>a</sup>                          | 9 [5, 13]            | 10 [3, 16]            | 0.486 <sup>d</sup> | 8 [3, 13]             | 11 [5, 16]            | 0.027 <sup>d</sup> | 9 [5, 15]             | 10 [3, 15]           | 0.898 <sup>d</sup> | 14 [7, 16]          | 9 [4, 15]             | 0.566 <sup>d</sup> |
| <b>INFECTION AT ELIGIBILITY<sup>b</sup></b> |                      |                       |                    |                       |                       |                    |                       |                      |                    |                     |                       |                    |
| Documented Infection                        | 56 (57%)             | 79 (52%)              | 0.518 <sup>e</sup> | 75 (52%)              | 61 (57%)              | 0.444 <sup>e</sup> | 85 (52%)              | 46 (56%)             | 0.684 <sup>e</sup> | 2 (50%)             | 137 (54%)             | 1.000 <sup>e</sup> |
| Bacterial                                   | 29 (29%)             | 60 (39%)              | 0.472 <sup>e</sup> | 47 (32%)              | 43 (40%)              | 0.407 <sup>e</sup> | 53 (33%)              | 32 (39%)             | 0.457 <sup>e</sup> | 1 (25%)             | 92 (36%)              | 0.639 <sup>e</sup> |
| Fungal                                      | 0 (0%)               | 3 (2%)                | 1.000 <sup>e</sup> | 0 (0%)                | 3 (3%)                | 0.528 <sup>e</sup> | 0 (0%)                | 3 (4%)               | 0.528 <sup>e</sup> | 0 (0%)              | 3 (1%)                | --                 |
| Protozoal                                   | 0 (0%)               | 0 (0%)                | --                 | 0 (0%)                | 0 (0%)                | --                 | 0 (0%)                | 0 (0%)               | --                 | 0 (0%)              | 0 (0%)                | --                 |
| Viral <sup>c</sup>                          | 31 (31%)             | 27 (18%)              | 0.705 <sup>e</sup> | 36 (25%)              | 22 (21%)              | 1.000 <sup>e</sup> | 40 (25%)              | 18 (22%)             | 0.286 <sup>e</sup> | 1 (25%)             | 57 (23%)              | 1.000 <sup>e</sup> |
| <b>DIAGNOSES</b>                            |                      |                       |                    |                       |                       |                    |                       |                      |                    |                     |                       |                    |
| ICU Admit Diagnosis                         |                      |                       | 0.042 <sup>e</sup> |                       |                       | 0.565 <sup>e</sup> |                       |                      | 0.003 <sup>e</sup> |                     |                       | 1.000 <sup>e</sup> |
| Cardiac arrest                              | 3 (3%)               | 5 (3%)                |                    | 5 (3%)                | 2 (2%)                |                    | 7 (4%)                | 1 (1%)               |                    | 0 (0%)              | 8 (3%)                |                    |
| Cardiac disease                             | 1 (1%)               | 5 (3%)                |                    | 3 (2%)                | 3 (3%)                |                    | 3 (2%)                | 3 (4%)               |                    | 0 (0%)              | 6 (2%)                |                    |
| Liver failure                               | 0 (0%)               | 1 (1%)                |                    | 0 (0%)                | 1 (1%)                |                    | 0 (0%)                | 1 (1%)               |                    | 0 (0%)              | 1 (0%)                |                    |
| Renal failure                               | 1 (1%)               | 6 (4%)                |                    | 2 (1%)                | 4 (4%)                |                    | 1 (1%)                | 5 (6%)               |                    | 0 (0%)              | 7 (3%)                |                    |
| Respiratory failure                         | 53 (54%)             | 46 (30%)              |                    | 63 (43%)              | 36 (34%)              |                    | 72 (44%)              | 24 (29%)             |                    | 2 (50%)             | 98 (39%)              |                    |

**eTable 2.** Patient Characteristics at ICU Admission by Results of Viral Serologic Testing

|                                          | EBV Serology         |                       |                    | CMV Serology          |                       |                    | HSV Serology          |                      |                    | HHV-6 Serology      |                       |                    |
|------------------------------------------|----------------------|-----------------------|--------------------|-----------------------|-----------------------|--------------------|-----------------------|----------------------|--------------------|---------------------|-----------------------|--------------------|
|                                          | Negative<br>(N = 99) | Positive<br>(N = 152) | P-value            | Negative<br>(N = 145) | Positive<br>(N = 107) | P-value            | Negative<br>(N = 162) | Positive<br>(N = 82) | P-value            | Negative<br>(N = 4) | Positive<br>(N = 253) | P-value            |
| Seizure                                  | 2 (2%)               | 4 (3%)                |                    | 5 (3%)                | 2 (2%)                |                    | 7 (4%)                | 0 (0%)               |                    | 0 (0%)              | 7 (3%)                |                    |
| Sepsis                                   | 27 (27%)             | 59 (39%)              |                    | 45 (31%)              | 42 (39%)              |                    | 48 (30%)              | 36 (44%)             |                    | 5 (50%)             | 87 (34%)              |                    |
| Other neurologic disease                 | 3 (3%)               | 7 (5%)                |                    | 6 (4%)                | 4 (4%)                |                    | 6 (4%)                | 4 (5%)               |                    | 0 (0%)              | 10 (4%)               |                    |
| Other                                    | 9 (9%)               | 19 (13%)              |                    | 16 (11%)              | 13 (12%)              |                    | 18 (11%)              | 8 (10%)              |                    | 0 (0%)              | 29 (11%)              |                    |
| <b>PAST MEDICAL HISTORY</b>              |                      |                       |                    |                       |                       |                    |                       |                      |                    |                     |                       |                    |
| Previously healthy                       | 41 (41%)             | 48 (32%)              | 0.137 <sup>e</sup> | 60 (41%)              | 28 (26%)              | 0.016 <sup>e</sup> | 66 (41%)              | 22 (27%)             | 0.035 <sup>e</sup> | 1 (25%)             | 89 (35%)              | 1.000 <sup>e</sup> |
| Immunocompromised                        | 14 (14%)             | 61 (40%)              | <.001 <sup>e</sup> | 29 (20%)              | 47 (44%)              | <.001 <sup>e</sup> | 35 (22%)              | 34 (41%)             | 0.002 <sup>e</sup> | 1 (25%)             | 76 (30%)              | 1.000 <sup>e</sup> |
| Malignancy- Hematologic                  | 3 (3%)               | 22 (14%)              | 0.002 <sup>e</sup> | 7 (5%)                | 18 (17%)              | 0.002 <sup>e</sup> | 7 (4%)                | 16 (20%)             | <.001 <sup>e</sup> | 0 (0%)              | 26 (10%)              | 1.000 <sup>e</sup> |
| Malignancy- Solid tumor                  | 1 (1%)               | 11 (7%)               | 0.031 <sup>e</sup> | 4 (3%)                | 7 (7%)                | 0.212 <sup>e</sup> | 6 (4%)                | 5 (6%)               | 0.515 <sup>e</sup> | 0 (0%)              | 12 (5%)               | 1.000 <sup>e</sup> |
| Hematopoietic cell transplant            | 0 (0%)               | 17 (11%)              | <.001 <sup>e</sup> | 2 (1%)                | 15 (14%)              | <.001 <sup>e</sup> | 2 (1%)                | 14 (17%)             | <.001 <sup>e</sup> | 0 (0%)              | 17 (7%)               | 1.000 <sup>e</sup> |
| Solid organ transplant                   | 2 (2%)               | 6 (4%)                | 0.485 <sup>e</sup> | 4 (3%)                | 4 (4%)                | 0.726 <sup>e</sup> | 4 (2%)                | 4 (5%)               | 0.448 <sup>e</sup> | 0 (0%)              | 8 (3%)                | 1.000 <sup>e</sup> |
| Genetic Disorder/Chromosomal abnormality | 13 (13%)             | 22 (14%)              | 0.853 <sup>e</sup> | 21 (14%)              | 13 (12%)              | 0.710 <sup>e</sup> | 21 (13%)              | 13 (16%)             | 0.560 <sup>e</sup> | 0 (0%)              | 35 (14%)              | 1.000 <sup>e</sup> |
| Metabolic/Mitochondrial disease          | 6 (6%)               | 6 (4%)                | 0.548 <sup>e</sup> | 9 (6%)                | 4 (4%)                | 0.566 <sup>e</sup> | 11 (7%)               | 1 (1%)               | 0.065 <sup>e</sup> | 2 (50%)             | 11 (4%)               | 0.013 <sup>e</sup> |

There were n=108 patients 18 months old or younger excluded from this table. For each serology test, serology-positive patients who received IVIG administration on the same day or before serology sample collection are excluded.

<sup>a</sup> The worst physiologic values 2 hours prior to ICU admission through 4 hours post ICU admission were used to calculate PRISM.

<sup>b</sup> Patients could have had multiple types of documented infection at eligibility; counts are not mutually exclusive.

<sup>c</sup> Viral infection(s) at eligibility was determined by respective research coordinator chart review and does not include results of investigative viral testing subsequently performed for this study.

<sup>d</sup> Wilcoxon rank-sum test.

<sup>e</sup> Fisher's exact test (Monte Carlo approximation for tables larger than 2X2).

**eTable 3.** Comparisons of Herpesvirus PCR and Serology Status

| <b>EBV</b>   |                         | <b>CMV</b>   |                         | <b>HSV</b>   |                         | <b>HHV-6</b> |                         |
|--------------|-------------------------|--------------|-------------------------|--------------|-------------------------|--------------|-------------------------|
| Viral Status | No. of Patients (row %) | Viral Status | No. of Patients (row %) | Viral Status | No. of Patients (row %) | Viral Status | No. of Patients (row %) |
| IgG+ / PCR+  | 39/251 (16%)            | IgG+ / PCR+  | 19/254 (7%)             | IgG+ / PCR+  | 8/246 (3%)              | IgG+ / PCR+  | 61/257 (24%)            |
| IgG+ / PCR-  | 113/251 (45%)           | IgG+ / PCR-  | 88/254 (35%)            | IgG+ / PCR-  | 74/246 (30%)            | IgG+ / PCR-  | 192/257 (75%)           |
| IgG- / PCR+  | 4/251 (2%)              | IgG- / PCR+  | 11/254 (4%)             | IgG- / PCR+  | 0/246 (0%)              | IgG- / PCR+  | 0/257 (0%)              |
| IgG- / PCR-  | 95/251 (38%)            | IgG- / PCR-  | 136/254 (54%)           | IgG- / PCR-  | 164/246 (67%)           | IgG- / PCR-  | 4/257 (2%)              |
| IgG+ / PCR+  | 39/152 (26%)            | IgG+ / PCR+  | 19/107 (18%)            | IgG+ / PCR+  | 8/82 (10%)              | IgG+ / PCR+  | 61/253 (24%)            |
| IgG+ / PCR-  | 113/152 (74%)           | IgG+ / PCR-  | 88/107 (82%)            | IgG+ / PCR-  | 74/82 (90%)             | IgG+ / PCR-  | 192/253 (76%)           |
| IgG+ / PCR+  | 39/43 (91%)             | IgG+ / PCR+  | 19/30 (63%)             | IgG+ / PCR+  | 8/8 (100%)              | IgG+ / PCR+  | 61/61 (100%)            |
| IgG- / PCR+  | 4/43 (9%)               | IgG- / PCR+  | 11/30 (37%)             | IgG- / PCR+  | 0/8 (0%)                | IgG- / PCR+  | 0/61 (0%)               |
| IgG+ / PCR+  | 39/134 (29%)            | IgG+ / PCR+  | 19/155 (12%)            | IgG+ / PCR+  | 8/172 (5%)              | IgG+ / PCR+  | 61/65 (94%)             |
| IgG- / PCR-  | 95/134 (71%)            | IgG- / PCR-  | 136/155 (88%)           | IgG- / PCR-  | 164/172 (95%)           | IgG- / PCR-  | 4/65 (6%)               |
| IgG+ / PCR-  | 113/117 (97%)           | IgG+ / PCR-  | 88/99 (89%)             | IgG+ / PCR-  | 74/74 (100%)            | IgG+ / PCR-  | 192/192 (100%)          |
| IgG- / PCR+  | 4/117 (3%)              | IgG- / PCR+  | 11/99 (11%)             | IgG- / PCR+  | 0/74 (0%)               | IgG- / PCR+  | 0/192 (0%)              |
| IgG+ / PCR-  | 113/208 (54%)           | IgG+ / PCR-  | 88/224 (39%)            | IgG+ / PCR-  | 74/238 (31%)            | IgG+ / PCR-  | 192/196 (98%)           |
| IgG- / PCR-  | 95/208 (46%)            | IgG- / PCR-  | 136/224 (61%)           | IgG- / PCR-  | 164/238 (69%)           | IgG- / PCR-  | 4/196 (2%)              |
| IgG- / PCR+  | 4/99 (4%)               | IgG- / PCR+  | 11/147 (7%)             | IgG- / PCR+  | 0/164 (0%)              | IgG- / PCR+  | 0/4 (0%)                |
| IgG- / PCR-  | 95/99 (96%)             | IgG- / PCR-  | 136/147 (93%)           | IgG- / PCR-  | 164/164 (100%)          | IgG- / PCR-  | 4/4 (100%)              |

IgG refers to serology testing. There were n=108 patients 18 months old or younger and excluded. For each serology test, serology-positive patients who received IVIG administration on the same day or before serology sample collection are also excluded. Testing was unable to be performed in 13 patients in EBV, 12 patients with CMV, 20 patients with HSV and 7 patients with HHV-6 due to inadequate sample volume or testing error.

**eTable 4.** Univariable Analysis of Admission Demographic and Clinical Factors Associated With Mortality

|                             | Survived<br>(N = 357) | Died<br>(N = 44) | Odds ratio<br>(95% CI) | P-value |
|-----------------------------|-----------------------|------------------|------------------------|---------|
| <b>UNIVARIABLE ANALYSIS</b> |                       |                  |                        |         |
| Age (years)                 | 5.4 [1.4, 12.0]       | 7.9 [1.2, 14.5]  | 1.05 (0.99, 1.11)      | 0.080   |
| Sex                         |                       |                  |                        | 0.238   |
| Male                        | 194 (87%)             | 28 (13%)         | 1.47 (0.78, 2.87)      |         |
| Female                      | 163 (91%)             | 16 (9%)          | Reference              |         |
| Race                        |                       |                  |                        | 0.377   |
| White                       | 243 (90%)             | 27 (10%)         | Reference              |         |
| Other/Not reported          | 114 (87%)             | 17 (13%)         | 1.34 (0.69, 2.54)      |         |
| Ethnicity                   |                       |                  |                        | 0.265   |
| Not Hispanic or Latino      | 282 (88%)             | 39 (12%)         | Reference              |         |
| Hispanic or Latino          | 61 (92%)              | 5 (8%)           | 0.59 (0.20, 1.44)      |         |
| Unknown or Not Reported     | 14 (100%)             | 0 (0%)           | --                     |         |
| PRISM <sup>b</sup>          | 7.0 [3.0, 13.0]       | 13.0 [8.5, 18.5] | 1.06 (1.02, 1.10)      | 0.001   |
| Previously healthy          | 148 (96%)             | 6 (4%)           | 0.22 (0.08, 0.50)      | <.001   |
| Immunocompromised           | 87 (81%)              | 21 (19%)         | 2.83 (1.49, 5.38)      | 0.002   |

<sup>a</sup> Row-wise percentages are presented in this table.

<sup>b</sup> The worst physiologic values 2 hours prior to ICU admission through 4 hours post ICU admission were used to calculate PRISM.

**eTable 5.** Comparisons of EBV PCR and Serology Status and Mortality

| <b>EBV</b>  |                 |              |                    |
|-------------|-----------------|--------------|--------------------|
|             | <b>Survived</b> | <b>Died</b>  | <b>P-value</b>     |
|             |                 |              | 0.004 <sup>a</sup> |
| IgG+ / PCR+ | 33/39 (85%)     | 6/39 (15%)   |                    |
| IgG+ / PCR- | 96/113 (85%)    | 17/113 (15%) |                    |
| IgG- / PCR+ | 4/4 (100%)      | 0/4 (0%)     |                    |
| IgG- / PCR- | 93/95 (98%)     | 2/95 (2%)    |                    |
| Incomplete  | 13/13 (100%)    | 0/13 (0%)    |                    |
|             |                 |              | 1.000 <sup>a</sup> |
| IgG+ / PCR+ | 33/39 (85%)     | 6/39 (15%)   |                    |
| IgG+ / PCR- | 96/113 (85%)    | 17/113 (15%) |                    |
|             |                 |              | 1.000 <sup>a</sup> |
| IgG+ / PCR+ | 33/39 (85%)     | 6/39 (15%)   |                    |
| IgG- / PCR+ | 4/4 (100%)      | 0/4 (0%)     |                    |
|             |                 |              | 0.008 <sup>a</sup> |
| IgG+ / PCR+ | 33/39 (85%)     | 6/39 (15%)   |                    |
| IgG- / PCR- | 93/95 (98%)     | 2/95 (2%)    |                    |
|             |                 |              | 1.000 <sup>a</sup> |
| IgG+ / PCR- | 96/113 (85%)    | 17/113 (15%) |                    |
| IgG- / PCR+ | 4/4 (100%)      | 0/4 (0%)     |                    |
|             |                 |              | 0.001 <sup>a</sup> |
| IgG+ / PCR- | 96/113 (85%)    | 17/113 (15%) |                    |
| IgG- / PCR- | 93/95 (98%)     | 2/95 (2%)    |                    |
|             |                 |              | 1.000 <sup>a</sup> |
| IgG- / PCR+ | 4/4 (100%)      | 0/4 (0%)     |                    |
| IgG- / PCR- | 93/95 (98%)     | 2/95 (2%)    |                    |

IgG refers to serology testing. A positive serology considers EBV, CMV, or HSV tests. There were n=108 patients 18 months old or younger and excluded. There were patients with 'incomplete' serology testing, but these do not contribute to the p-value calculations.

For each serology test, serology-positive patients who received IVIG administration on the same day or before serology sample collection are excluded. Incomplete serology results do not contribute to p-value calculations. Row-wise percentages are presented in this table.

<sup>a</sup> Fisher's exact test



**eTable 6.** Comparisons of CMV PCR and Serology Status and Mortality

| <b>CMV</b>  |                 |             |                    |
|-------------|-----------------|-------------|--------------------|
|             | <b>Survived</b> | <b>Died</b> | <b>P-value</b>     |
|             |                 |             | 0.002 <sup>a</sup> |
| IgG+ / PCR+ | 13/19 (68%)     | 6/19 (32%)  |                    |
| IgG+ / PCR- | 77/88 (88%)     | 11/88 (13%) |                    |
| IgG- / PCR+ | 10/11 (91%)     | 1/11 (9%)   |                    |
| IgG- / PCR- | 130/136 (96%)   | 6/136 (4%)  |                    |
| Incomplete  | 11/12 (92%)     | 1/12 (8%)   |                    |
|             |                 |             | 0.076 <sup>a</sup> |
| IgG+ / PCR+ | 13/19 (68%)     | 6/19 (32%)  |                    |
| IgG+ / PCR- | 77/88 (88%)     | 11/88 (13%) |                    |
|             |                 |             | 0.215 <sup>a</sup> |
| IgG+ / PCR+ | 13/19 (68%)     | 6/19 (32%)  |                    |
| IgG- / PCR+ | 10/11 (91%)     | 1/11 (9%)   |                    |
|             |                 |             | <.001 <sup>a</sup> |
| IgG+ / PCR+ | 13/19 (68%)     | 6/19 (32%)  |                    |
| IgG- / PCR- | 130/136 (96%)   | 6/136 (4%)  |                    |
|             |                 |             | 1.000 <sup>a</sup> |
| IgG+ / PCR- | 77/88 (88%)     | 11/88 (13%) |                    |
| IgG- / PCR+ | 10/11 (91%)     | 1/11 (9%)   |                    |
|             |                 |             | 0.037 <sup>a</sup> |
| IgG+ / PCR- | 77/88 (88%)     | 11/88 (13%) |                    |
| IgG- / PCR- | 130/136 (96%)   | 6/136 (4%)  |                    |
|             |                 |             | 0.427 <sup>a</sup> |
| IgG- / PCR+ | 10/11 (91%)     | 1/11 (9%)   |                    |
| IgG- / PCR- | 130/136 (96%)   | 6/136 (4%)  |                    |

IgG refers to serology testing. A positive serology considers EBV, CMV, or HSV tests. There were n=108 patients 18 months old or younger and excluded. There were patients with 'incomplete' serology testing, but these do not contribute to the p-value calculations.

For each serology test, serology-positive patients who received IVIG administration on the same day or before serology sample collection are excluded. Incomplete serology results do not contribute to p-value calculations. Row-wise percentages are presented in this table.

<sup>a</sup> Fisher's exact test

**eTable 7.** Comparisons of HSV-1 PCR and Serology Status and Mortality

| HSV-1       |               |             |                    |
|-------------|---------------|-------------|--------------------|
|             | Survived      | Died        | P-value            |
|             |               |             | 0.002 <sup>a</sup> |
| IgG+ / PCR+ | 8/8 (100%)    | 0/8 (0%)    |                    |
| IgG+ / PCR- | 59/74 (80%)   | 15/74 (20%) |                    |
| IgG- / PCR+ | 0/0 (0%)      | 0/0 (0%)    |                    |
| IgG- / PCR- | 155/164 (95%) | 9/164 (5%)  |                    |
| Incomplete  | 19/20 (95%)   | 1/20 (5%)   |                    |
|             |               |             | 0.340 <sup>a</sup> |
| IgG+ / PCR+ | 8/8 (100%)    | 0/8 (0%)    |                    |
| IgG+ / PCR- | 59/74 (80%)   | 15/74 (20%) |                    |
|             |               |             | --                 |
| IgG+ / PCR+ | 8/8 (100%)    | 0/8 (0%)    |                    |
| IgG- / PCR+ | 0/0 (0%)      | 0/0 (0%)    |                    |
|             |               |             | 1.000 <sup>a</sup> |
| IgG+ / PCR+ | 8/8 (100%)    | 0/8 (0%)    |                    |
| IgG- / PCR- | 155/164 (95%) | 9/164 (5%)  |                    |
|             |               |             | --                 |
| IgG+ / PCR- | 59/74 (80%)   | 15/74 (20%) |                    |
| IgG- / PCR+ | 0/0 (0%)      | 0/0 (0%)    |                    |
|             |               |             | <.001 <sup>a</sup> |
| IgG+ / PCR- | 59/74 (80%)   | 15/74 (20%) |                    |
| IgG- / PCR- | 155/164 (95%) | 9/164 (5%)  |                    |
|             |               |             | --                 |
| IgG- / PCR+ | 0/0 (0%)      | 0/0 (0%)    |                    |
| IgG- / PCR- | 155/164 (95%) | 9/164 (5%)  |                    |

IgG refers to serology testing. A positive serology considers EBV, CMV, or HSV tests. There were n=108 patients 18 months old or younger and excluded. There were patients with 'incomplete' serology testing, but these do not contribute to the p-value calculations.

For each serology test, serology-positive patients who received IVIG administration on the same day or before serology sample collection are excluded. Incomplete serology results do not contribute to p-value calculations. Row-wise percentages are presented in this table.

<sup>a</sup> Fisher's exact test

**eTable 8.** Comparisons of HHV-6 PCR and Serology Status and Mortality

| HHV-6       |               |             |                    |
|-------------|---------------|-------------|--------------------|
|             | Survived      | Died        | P-value            |
|             |               |             | 0.060 <sup>a</sup> |
| IgG+ / PCR+ | 50/61 (82%)   | 11/61 (18%) |                    |
| IgG+ / PCR- | 178/192 (93%) | 14/192 (7%) |                    |
| IgG- / PCR+ | 0/0 (0%)      | 0/0 (0%)    |                    |
| IgG- / PCR- | 4/4 (100%)    | 0/4 (0%)    |                    |
| Incomplete  | 7/7 (100%)    | 0/7 (0%)    |                    |
|             |               |             | 0.024 <sup>a</sup> |
| IgG+ / PCR+ | 50/61 (82%)   | 11/61 (18%) |                    |
| IgG+ / PCR- | 178/192 (93%) | 14/192 (7%) |                    |
|             |               |             | --                 |
| IgG+ / PCR+ | 50/61 (82%)   | 11/61 (18%) |                    |
| IgG- / PCR+ | 0/0 (0%)      | 0/0 (0%)    |                    |
|             |               |             | 1.000 <sup>a</sup> |
| IgG+ / PCR+ | 50/61 (82%)   | 11/61 (18%) |                    |
| IgG- / PCR- | 4/4 (100%)    | 0/4 (0%)    |                    |
|             |               |             | --                 |
| IgG+ / PCR- | 178/192 (93%) | 14/192 (7%) |                    |
| IgG- / PCR+ | 0/0 (0%)      | 0/0 (0%)    |                    |
|             |               |             | 1.000 <sup>a</sup> |
| IgG+ / PCR- | 178/192 (93%) | 14/192 (7%) |                    |
| IgG- / PCR- | 4/4 (100%)    | 0/4 (0%)    |                    |
|             |               |             | --                 |
| IgG- / PCR+ | 0/0 (0%)      | 0/0 (0%)    |                    |
| IgG- / PCR- | 4/4 (100%)    | 0/4 (0%)    |                    |

IgG refers to serology testing. A positive serology considers EBV, CMV, or HSV tests. There were n=108 patients 18 months old or younger and excluded. There were patients with 'incomplete' serology testing, but these do not contribute to the p-value calculations.

For each serology test, serology-positive patients who received IVIG administration on the same day or before serology sample collection are excluded. Incomplete serology results do not contribute to p-value calculations. Row-wise percentages are presented in this table.

<sup>a</sup> Fisher's exact test

**eTable 9.** Comparison of Ferritin, CRP, and PRISM Across EBV Virus Positivity Cohorts in Vital Status Categories

|                                 | EBV                    |                         |                      |                       |                     | P-value            |
|---------------------------------|------------------------|-------------------------|----------------------|-----------------------|---------------------|--------------------|
|                                 | S+ / PCR+<br>(N = 33)  | S+ / PCR-<br>(N = 96)   | S- / PCR+<br>(N = 4) | S- / PCR-<br>(N = 93) | Missing<br>(N = 13) |                    |
| <b>PICU Mortality - Alive</b>   |                        |                         |                      |                       |                     |                    |
| Max ferritin from blood samples |                        |                         |                      |                       |                     | <.001 <sup>1</sup> |
| n=N                             | n=33                   | n=95                    | n=4                  | n=93                  | n=13                |                    |
| Median [Q1, Q3]                 | 481.0 [172.6, 718.0]   | 321.0 [134.0, 1011.9]   | 114.0 [48.5, 304.0]  | 192.8 [92.0, 302.0]   | 183.0 [77.0, 624.0] |                    |
| Max CRP                         |                        |                         |                      |                       |                     | 0.047 <sup>1</sup> |
| n=N                             | n=33                   | n=96                    | n=4                  | n=93                  | n=13                |                    |
| Median [Q1, Q3]                 | 19.9 [12.4, 36.8]      | 18.7 [8.9, 27.7]        | 9.2 [4.0, 19.9]      | 13.9 [5.4, 25.4]      | 9.0 [6.4, 27.6]     |                    |
| Total PRISM score               |                        |                         |                      |                       |                     | 0.126 <sup>1</sup> |
| n=N                             | n=33                   | n=96                    | n=4                  | n=93                  | n=13                |                    |
| Median [Q1, Q3]                 | 11.0 [6.0, 16.0]       | 8.0 [3.0, 14.0]         | 2.5 [1.0, 7.0]       | 9.0 [5.0, 13.0]       | 11.0 [0.0, 16.0]    |                    |
| <b>PICU Mortality - Dead</b>    |                        |                         |                      |                       |                     |                    |
| Max ferritin from blood samples |                        |                         |                      |                       |                     | 0.030 <sup>1</sup> |
| n=N                             | n=6                    | n=17                    | n=0                  | n=2                   |                     |                    |
| Median [Q1, Q3]                 | 1070.5 [509.0, 1705.0] | 3044.0 [1104.0, 4454.0] | - [-, -]             | 83.0 [68.0, 98.0]     |                     |                    |
| Max CRP                         |                        |                         |                      |                       |                     | 0.454 <sup>1</sup> |
| n=N                             | n=6                    | n=17                    | n=0                  | n=2                   |                     |                    |
| Median [Q1, Q3]                 | 23.9 [9.6, 37.4]       | 31.6 [17.0, 39.4]       | - [-, -]             | 14.1 [7.5, 20.8]      |                     |                    |
| Total PRISM score               |                        |                         |                      |                       |                     | 0.908 <sup>1</sup> |
| n=N                             | n=6                    | n=17                    | n=0                  | n=2                   |                     |                    |
| Median [Q1, Q3]                 | 14.5 [0.0, 20.0]       | 14.0 [9.0, 19.0]        | - [-, -]             | 13.5 [10.0, 17.0]     |                     |                    |

<sup>1</sup> Kruskal-Wallis test.

**eTable 10.** Comparison of Ferritin, CRP, and PRISM Across CMV Virus Positivity Cohorts in Vital Status Categories

|                                 | CMV                     |                        |                       |                        |                         | P-value            |
|---------------------------------|-------------------------|------------------------|-----------------------|------------------------|-------------------------|--------------------|
|                                 | S+ / PCR+<br>(N = 13)   | S+ / PCR-<br>(N = 77)  | S- / PCR+<br>(N = 10) | S- / PCR-<br>(N = 128) | Missing<br>(N = 11)     |                    |
| <b>PICU Mortality - Alive</b>   |                         |                        |                       |                        |                         |                    |
| Max ferritin from blood samples |                         |                        |                       |                        |                         | <.001 <sup>1</sup> |
| n=N                             | n=12                    | n=77                   | n=10                  | n=128                  | n=11                    |                    |
| Median [Q1, Q3]                 | 690.8 [172.0, 2745.0]   | 370.0 [183.0, 1007.0]  | 278.0 [92.0, 443.0]   | 184.0 [94.5, 327.1]    | 569.0 [77.0, 783.0]     |                    |
| Max CRP                         |                         |                        |                       |                        |                         | 0.017 <sup>1</sup> |
| n=N                             | n=13                    | n=77                   | n=10                  | n=128                  | n=11                    |                    |
| Median [Q1, Q3]                 | 25.1 [9.1, 36.8]        | 22.1 [11.0, 27.9]      | 14.9 [3.7, 25.6]      | 13.5 [5.4, 22.6]       | 32.0 [7.4, 49.0]        |                    |
| Total PRISM score               |                         |                        |                       |                        |                         | 0.291 <sup>1</sup> |
| n=N                             | n=13                    | n=77                   | n=10                  | n=128                  | n=11                    |                    |
| Median [Q1, Q3]                 | 6.0 [2.0, 15.0]         | 11.0 [5.0, 15.0]       | 9.5 [3.0, 15.0]       | 7.5 [3.0, 13.0]        | 11.0 [5.0, 21.0]        |                    |
| <b>PICU Mortality - Dead</b>    |                         |                        |                       |                        |                         |                    |
| Max ferritin from blood samples |                         |                        |                       |                        |                         | 0.147 <sup>1</sup> |
| n=N                             | n=6                     | n=11                   | n=1                   | n=6                    | n=1                     |                    |
| Median [Q1, Q3]                 | 2118.8 [1161.0, 4454.0] | 2036.1 [141.0, 6361.0] | 117.0 [117.0, 117.0]  | 755.0 [88.3, 1705.0]   | 4380.0 [4380.0, 4380.0] |                    |
| Max CRP                         |                         |                        |                       |                        |                         | 0.448 <sup>1</sup> |
| n=N                             | n=6                     | n=11                   | n=1                   | n=6                    | n=1                     |                    |
| Median [Q1, Q3]                 | 31.7 [24.2, 45.0]       | 19.9 [6.3, 39.4]       | 9.6 [9.6, 9.6]        | 21.1 [20.8, 26.8]      | 41.4 [41.4, 41.4]       |                    |
| Total PRISM score               |                         |                        |                       |                        |                         | 0.454 <sup>1</sup> |
| n=N                             | n=6                     | n=11                   | n=1                   | n=6                    | n=1                     |                    |
| Median [Q1, Q3]                 | 16.0 [3.0, 20.0]        | 13.0 [10.0, 23.0]      | 19.0 [19.0, 19.0]     | 8.0 [0.0, 17.0]        | 18.0 [18.0, 18.0]       |                    |

<sup>1</sup> Kruskal-Wallis test.

**eTable 11.** Comparison of Ferritin, CRP, and PRISM Across HSV-1 Virus Positivity Cohorts in Vital Status Categories

|                                 | HSV                  |                         |                      |                        |                     | P-value            |
|---------------------------------|----------------------|-------------------------|----------------------|------------------------|---------------------|--------------------|
|                                 | S+ / PCR+<br>(N = 8) | S+ / PCR-<br>(N = 59)   | S- / PCR+<br>(N = 0) | S- / PCR-<br>(N = 153) | Missing<br>(N = 19) |                    |
| <b>PICU Mortality - Alive</b>   |                      |                         |                      |                        |                     |                    |
| Max ferritin from blood samples |                      |                         |                      |                        |                     | <.001 <sup>1</sup> |
| n=N                             | n=8                  | n=58                    | n=0                  | n=153                  | n=19                |                    |
| Median [Q1, Q3]                 | 354.5 [101.5, 495.0] | 490.8 [212.0, 1397.7]   | - [-, -]             | 187.0 [94.0, 329.0]    | 487.0 [77.0, 806.0] |                    |
| Max CRP                         |                      |                         |                      |                        |                     | <.001 <sup>1</sup> |
| n=N                             | n=8                  | n=59                    | n=0                  | n=153                  | n=19                |                    |
| Median [Q1, Q3]                 | 12.8 [8.0, 19.8]     | 25.6 [12.4, 32.6]       | - [-, -]             | 13.5 [5.4, 22.0]       | 23.2 [6.4, 35.1]    |                    |
| Total PRISM score               |                      |                         |                      |                        |                     | 0.343 <sup>1</sup> |
| n=N                             | n=8                  | n=59                    | n=0                  | n=153                  | n=19                |                    |
| Median [Q1, Q3]                 | 10.0 [5.0, 14.0]     | 6.0 [2.0, 14.0]         | - [-, -]             | 9.0 [5.0, 15.0]        | 6.0 [0.0, 15.0]     |                    |
| <b>PICU Mortality - Dead</b>    |                      |                         |                      |                        |                     |                    |
| Max ferritin from blood samples |                      |                         |                      |                        |                     | 0.069 <sup>1</sup> |
| n=N                             | n=0                  | n=15                    | n=0                  | n=9                    | n=1                 |                    |
| Median [Q1, Q3]                 | - [-, -]             | 3044.0 [1104.0, 6361.0] | - [-, -]             | 1001.0 [117.0, 1829.0] | 98.0 [98.0, 98.0]   |                    |
| Max CRP                         |                      |                         |                      |                        |                     | 0.655 <sup>1</sup> |
| n=N                             | n=0                  | n=15                    | n=0                  | n=9                    | n=1                 |                    |
| Median [Q1, Q3]                 | - [-, -]             | 31.6 [12.7, 45.0]       | - [-, -]             | 21.1 [20.8, 37.4]      | 7.5 [7.5, 7.5]      |                    |
| Total PRISM score               |                      |                         |                      |                        |                     | 0.199 <sup>1</sup> |
| n=N                             | n=0                  | n=15                    | n=0                  | n=9                    | n=1                 |                    |
| Median [Q1, Q3]                 | - [-, -]             | 15.0 [10.0, 23.0]       | - [-, -]             | 10.0 [6.0, 18.0]       | 10.0 [10.0, 10.0]   |                    |

<sup>1</sup> Kruskal-Wallis test.

**eTable 12.** Comparison of Ferritin, CRP, and PRISM Across HHV-6 Virus Positivity Cohorts in Vital Status Categories

|                                 | HHV6                     |                        |                      |                      |                     | P-value            |
|---------------------------------|--------------------------|------------------------|----------------------|----------------------|---------------------|--------------------|
|                                 | S+ / PCR+<br>(N = 50)    | S+ / PCR-<br>(N = 178) | S- / PCR+<br>(N = 0) | S- / PCR-<br>(N = 4) | Missing<br>(N = 7)  |                    |
| <b>PICU Mortality - Alive</b>   |                          |                        |                      |                      |                     |                    |
| Max ferritin from blood samples |                          |                        |                      |                      |                     | 0.423 <sup>1</sup> |
| n=N                             | n=49                     | n=178                  | n=0                  | n=4                  | n=7                 |                    |
| Median [Q1, Q3]                 | 226.0 [123.0, 1358.0]    | 228.6 [113.0, 487.0]   | - [-, -]             | 231.5 [93.5, 704.6]  | 147.0 [69.0, 783.0] |                    |
| Max CRP                         |                          |                        |                      |                      |                     | 0.158 <sup>1</sup> |
| n=N                             | n=50                     | n=178                  | n=0                  | n=4                  | n=7                 |                    |
| Median [Q1, Q3]                 | 21.3 [9.9, 28.8]         | 14.4 [6.8, 26.2]       | - [-, -]             | 24.5 [11.8, 36.8]    | 22.8 [6.4, 52.3]    |                    |
| Total PRISM score               |                          |                        |                      |                      |                     | 0.555 <sup>1</sup> |
| n=N                             | n=50                     | n=178                  | n=0                  | n=4                  | n=7                 |                    |
| Median [Q1, Q3]                 | 8.5 [5.0, 16.0]          | 8.0 [3.0, 13.0]        | - [-, -]             | 13.5 [6.5, 15.5]     | 15.0 [0.0, 21.0]    |                    |
| <b>PICU Mortality - Dead</b>    |                          |                        |                      |                      |                     |                    |
| Max ferritin from blood samples |                          |                        |                      |                      |                     | 0.055 <sup>1</sup> |
| n=N                             | n=11                     | n=14                   | n=0                  | n=0                  |                     |                    |
| Median [Q1, Q3]                 | 1829.0 [1140.0, 14055.0] | 1052.5 [100.0, 3044.0] | - [-, -]             | - [-, -]             |                     |                    |
| Max CRP                         |                          |                        |                      |                      |                     | 0.067 <sup>1</sup> |
| n=N                             | n=11                     | n=14                   | n=0                  | n=0                  |                     |                    |
| Median [Q1, Q3]                 | 37.4 [17.0, 45.0]        | 20.9 [7.5, 31.7]       | - [-, -]             | - [-, -]             |                     |                    |
| Total PRISM score               |                          |                        |                      |                      |                     | 0.742 <sup>1</sup> |
| n=N                             | n=11                     | n=14                   | n=0                  | n=0                  |                     |                    |
| Median [Q1, Q3]                 | 18.0 [0.0, 20.0]         | 13.0 [10.0, 19.0]      | - [-, -]             | - [-, -]             |                     |                    |

<sup>1</sup> Kruskal-Wallis test.
