# Supplementary material for: Viral DNAemia and DNA Virus Seropositivity and Mortality in Pediatric Sepsis
Source: PubMed Central journal article supplement (PMC10897747; doi:10.1001/jamanetworkopen.2024.0383), 2024-02-26
Supplement: jamanetwopen-e240383-s002.pdf [file jamanetwopen-e240383-s002.pdf]

## Data Sharing Statement

Cabler. Viral DNAemia and DNA Virus Seropositivity and Mortality in Pediatric Sepsis. *JAMA Netw Open*. Published February 26, 2024. doi:10.1001/jamanetworkopen.2024.0383

### Data

**Data available:** Yes

**Data types:** Deidentified participant data, Data dictionary

**How to access data:** The data is available from the DASH website maintained by the NICHD. Permission must be requested for IRB approval from the University of Utah Data Coordinating Center for the NICHD Collaborative Pediatric Critical Care Research Network.

**When available:** With publication

### Supporting Documents

**Document types:** None

### Additional Information

**Who can access the data:** Researchers whose proposed use of the data has been approved by the University of Utah Data Coordinating Center for the NICHD Collaborative Pediatric Critical Care Research Network.

**Types of analyses:** Any

**Mechanisms of data availability:** Without investigator support, after approval of a proposal, with signed data access agreement.
